# Predicting adverse obstetric outcome after early pregnancy events and complications: a review

R.H.F. van Oppenraaij<sup>1</sup>, E. Jauniaux<sup>2</sup>, O.B. Christiansen<sup>3</sup>,  
J.A. Horcajadas<sup>4</sup>, R.G. Farquharson<sup>5</sup> and N. Exalto<sup>1,6</sup>, on behalf  
of the ESHRE Special Interest Group for Early Pregnancy (SIGEP)

<sup>1</sup>Division of Obstetrics and Prenatal Medicine, Department of Obstetrics and Gynaecology, Erasmus University Medical Center, Room Ba-226, PO Box 2040, 3000 CA Rotterdam, The Netherlands <sup>2</sup>Academic Department of Obstetrics and Gynaecology, EGA Institute for Women's Health, Royal Free and University College London Medical School, London, UK <sup>3</sup>Fertility Clinic 4071, Rigshospitalet, University Hospital Copenhagen, Copenhagen, Denmark <sup>4</sup>Instituto Valenciano de Infertilidad Foundation (FIV), University of Valencia, Valencia, Spain <sup>5</sup>Department of Obstetrics and Gynaecology, Liverpool Women's Hospital, Liverpool, UK

<sup>6</sup>Correspondence address. Department of Obstetrics and Gynaecology, Division Obstetrics and Prenatal Medicine, Erasmus MC, Room Ba-226, PO Box 2040, 3000 CA Rotterdam. Tel: +31-10-703-39-17; Fax: +31-23-524-28-52; E-mail: exalto@gyn.nl

## TABLE OF CONTENTS

- Introduction
- Methods
- Previous miscarriage
- Recurrent miscarriage
- Termination of pregnancy
- Threatened miscarriage
- Intrauterine haematoma
- Crown-rump length discrepancy
- Vanishing twin
- Hyperemesis gravidarum
- Pregnancy with an IUD
- Conclusions
- Supplementary data

**BACKGROUND:** The aim was to evaluate the impact of early pregnancy events and complications as predictors of adverse obstetric outcome.

**METHODS:** We conducted a literature review on the impact of first trimester complications in previous and index pregnancies using Medline and Cochrane databases covering the period 1980–2008.

**RESULTS:** Clinically relevant associations of adverse outcome in the subsequent pregnancy with an odds ratio (OR) > 2.0 after complications in a previous pregnancy are the risk of perinatal death after a single previous miscarriage, the risk of very preterm delivery (VPTD) after two or more miscarriages, the risk of placenta praevia, premature preterm rupture of membranes, VPTD and low birthweight (LBW) after recurrent miscarriage and the risk of VPTD after two or more termination of pregnancy. Clinically relevant associations of adverse obstetric outcome in the ongoing pregnancy with an OR > 2.0 after complications in the index pregnancy are the risk of LBW and very low birthweight (VLBW) after a threatened miscarriage, the risk of pregnancy-induced hypertension, pre-eclampsia, placental abruption, preterm delivery (PTD), small for gestational age and low 5-min Apgar score after detection of an intrauterine haematoma, the risk of VPTD and intrauterine growth restriction after a crown-rump length discrepancy, the risk of VPTD, LBW and VLBW after a vanishing twin phenomenon and the risk of PTD, LBW and low 5-min Apgar score in a pregnancy complicated by severe hyperemesis gravidarum.

**CONCLUSIONS:** Data from our literature review indicate, by finding significant associations, that specific early pregnancy events and complications are predictors for subsequent adverse obstetric and perinatal outcome. Though, some of these associations are based on limited or small uncontrolled studies. Larger population-based controlled studies are needed to confirm these findings. Nevertheless, identification of these risks will improve obstetric care.

**Key words:** first trimester complication / adverse obstetric outcome / miscarriage / recurrent miscarriage / threatened miscarriage

## Introduction

Early pregnancy events and complications are among the most common general medical complications in women during pregnancy. Most of these occur before 12 weeks of gestation and include (recurrent) miscarriage, vaginal bleeding, intrauterine haematoma (IUH), vanishing twin and hyperemesis gravidarum (HG). The presence of any complication can be extremely distressing for the women. For the clinician, it is important to interpret the symptoms and to understand the short- and long-term consequences of early pregnancy complications, especially for reassuring and supporting the couple at a difficult time (Lamb, 2002; Griebel *et al.*, 2005). In particular, it is pivotal to evaluate the likelihood of subsequent adverse obstetric outcome as secondary complication and to be vigilant in screening and intervening, if possible, to avoid or reduce the anticipated detrimental effects.

Data on the link between early pregnancy complications and obstetric outcome and their possible treatment or prevention are sparse and mainly limited to retrospective small series of many different pathologies or large series describing specific pathology. This has prompted the ESHRE Special Interest Group for Early Pregnancy (SIGEP) to perform a comprehensive review of first trimester pregnancy events and complications as a precursor or indicator of late pregnancy events and beyond. Given the paucity of good quality data, this paper rests on the best available evidence rather than on a formal systematic review.

## Methods

For this review, the following conditions were included and evaluated as early pregnancy complications (presenting <12 weeks of gestation), defined as adverse clinical events in the obstetric history: previous miscarriage, recurrent miscarriage (RM, three or more miscarriages), termination of pregnancy (TOP) or complications in the ongoing pregnancy: threatened miscarriage, IUH, crown-rump length (CRL) discrepancy, vanishing twin, HG and pregnancy with an intrauterine device (IUD).

As late pregnancy sequelae, we have included: antepartum haemorrhage (APH), pregnancy-induced hypertension (PIH, blood pressure >140/90 mmHg measured twice, taken at least 6 h apart), pre-eclampsia (PE, as PIH and  $\geq 300$  mg protein in 24 h urine sample), placental abruption, placenta praevia, preterm premature rupture of membranes [PPROMs, rupture of membranes <37 weeks gestational age (GA) and more than 24 h before delivery], preterm delivery (PTD, <37 weeks GA), very preterm delivery (VPTD, <34 weeks GA), intrauterine growth restriction (IUGR, birthweight <5th percentile for GA), small for gestational age (SGA, birthweight <10th percentile for GA), and the impact on perinatal outcome including low birthweight (LBW, <2500 g), very low birthweight (VLBW, <1500 g), congenital malformations, low 5-min Apgar score (<7), intrauterine fetal death (>24 weeks GA) and perinatal death (within 30 days after delivery).

For each specific early pregnancy event and complication, we performed a systematic literature search using Medline and the Cochrane Database, covering the period between 1980 and October 2008. Free text search terms and Medical Subject Headings (MeSH) terms for each specific early pregnancy complication were combined with each late pregnancy sequel and perinatal outcome. Furthermore, we used, as an 'umbrella' approach, MeSH terms of each early pregnancy complication combined with *pregnancy outcome* and each late complication combined with *aetiology* or *risk factors*. Hereafter, reference lists of the retrieved publications were searched by hand. Excluded were studies in which (i) another language than English was used, (ii) an appropriate control group was missing (no control group present or non-comparable groups due to major differences in patient characteristics) and (iii) the early or late pregnancy complications were poorly defined or were merged.

For each study, the odds ratio (OR), favoured for retrospective cohort and case-control studies and prospective studies with multivariate analysis, or relative risks (RR), used in prospective randomized controlled trials and cohort studies, with the associated 95% confidence interval (CI), were retrieved. In this review, we did not apply formal meta-analysis as heterogeneity of data did not allow for this technique. Results were summarized in two tables. The definitions of the levels of evidence and grades of recommendation used in this review originate from the Oxford centre for evidence-based medicine (2001). The prognostic value of previous first trimester events for the subsequent index pregnancy is summarized in Table I. The prognostic value of first trimester complications for the same pregnancy is summarized in Table II.

## Previous miscarriage

A sporadic miscarriage is defined as a single or maximum two episodes of spontaneous pregnancy loss before 20 weeks GA (Farquharson *et al.*, 2005). The overall incidence of clinical sporadic miscarriage is ~12% (Blohm *et al.*, 2008). After a previous miscarriage, the risk of miscarriage in the subsequent pregnancy is increased to 16–20% (Regan *et al.*, 1989; Knudsen *et al.*, 1991).

There is in the next pregnancy after a miscarriage an increased risk of PPRM, PTD, VPTD and possibly PE. This risk increases with the number of miscarriages and these women also have an increased risk of placental abruption, placenta praevia and SGA (Table I and Supplementary Appendix Tables A1 and A2). Possibly, the pathological mechanisms which can be attributed to miscarriage (like thrombophilia disorders, maternal immunologic and hormonal abnormalities, infection, incompetent cervix and uterine abnormalities), interpregnancy interval and treatment modality could explain some of the associations with adverse obstetric outcome (Thom *et al.*, 1992; Sheiner *et al.*, 2005). However, it is informative for couples to know that a small study has found that the interval to the next pregnancy and the live birth rate in the next pregnancy does not depend on the treatment modality for the miscarriage (Tam *et al.*, 2005).

**Table 1** Early pregnancy events and complications as risk factors for adverse obstetric outcome in the subsequent pregnancy

|                                      | Previous miscarriage          |   |                               |   | Recurrent miscarriage          |   | Termination of pregnancy       |   |                                |   |
|--------------------------------------|-------------------------------|---|-------------------------------|---|--------------------------------|---|--------------------------------|---|--------------------------------|---|
|                                      | One                           | G | Two or more                   | G | Three or more                  | G | One                            | G | Two or more                    | G |
| <i>Obstetric outcome</i>             |                               |   |                               |   |                                |   |                                |   |                                |   |
| Pregnancy-induced hypertension       | NS                            | D | NS                            | D | No data                        | D | NS                             | D | No data                        | D |
| Pre-eclampsia                        | OR 3.3 (2.6–4.6) <sup>1</sup> | D | OR 1.5 (1.3–1.8) <sup>5</sup> | C | NS                             | C | NS                             | C | NS                             | C |
| Placental abruption                  | NS                            | C | OR 1.5 (1.1–1.7) <sup>5</sup> | C | NS                             | C | NS                             | D | NS                             | D |
| Placenta praevia                     | NS                            | C | OR 1.7 (1.3–2.3) <sup>5</sup> | C | RR 6.0 (1.6–22.2) <sup>4</sup> | C | NS                             | C | NS                             | C |
| PPROM                                | OR 1.9 (1.5–2.6) <sup>2</sup> | B | OR 1.2 (1.1–1.3) <sup>5</sup> | B | OR 2.6 (1.6–4.5) <sup>7</sup>  | C | OR 1.4 (1.1–1.7) <sup>8</sup>  | B | OR 1.9 (1.3–2.9) <sup>12</sup> | C |
| Preterm delivery <37 weeks           | OR 1.1 (1.1–1.2) <sup>2</sup> | B | OR 1.6 (1.3–1.9) <sup>2</sup> | B | RR 1.5 (1.1–2.1) <sup>4</sup>  | B | OR 1.2 (1.1–1.3) <sup>9</sup>  | B | OR 1.9 (1.4–2.5) <sup>9</sup>  | B |
| Very preterm delivery <34 weeks      | OR 1.5 (1.2–1.7) <sup>2</sup> | B | OR 2.7 (1.8–4.0) <sup>2</sup> | B | RR 2.4 (1.4–4.3) <sup>4</sup>  | B | OR 1.5 (1.1–2.0) <sup>10</sup> | B | OR 2.6 (1.1–5.9) <sup>10</sup> | B |
| <i>Perinatal outcome</i>             |                               |   |                               |   |                                |   |                                |   |                                |   |
| Intrauterine growth restriction <5th | No data                       | D | No data                       | D | No data                        | D | No data                        | D | No data                        | D |
| Small for gestational age <10th      | NS                            | B | OR 1.4 (1.2–1.6) <sup>6</sup> | C | NS                             | C | NS                             | B | NS                             | B |
| Low birthweight <2500 g              | NS                            | B | OR 1.9 (1.5–2.4) <sup>6</sup> | C | RR 2.0 (1.4–2.8) <sup>4</sup>  | C | NS                             | B | NS                             | D |
| Very low birthweight <1500 g         | No data                       | D | No data                       | D | no data                        | D | OR 2.7 (1.1–7.1) <sup>11</sup> | D | OR 3.6 (2.3–5.5) <sup>13</sup> | D |
| Congenital malformation              | NS                            | D | Inconclusive <sup>3,4</sup>   | D | RR 1.8 (1.1–3.0) <sup>4</sup>  | C | NS                             | B | NS                             | D |
| Low 5-min Apgar score                | NS                            | C | NS                            | C | NS                             | C | NS                             | C | NS                             | C |
| Intrauterine fetal death             | OR 1.9 (1.1–3.6) <sup>1</sup> | C | No data                       | D | No data                        | D | NS                             | B | NS                             | C |
| Perinatal death                      | OR 2.3 (1.1–4.8) <sup>1</sup> | C | NS                            | C | NS                             | D | NS                             | B | NS                             | C |

Data are reported as odds ratio (OR) or relative risk (RR) with 95% confidence interval (CI) of the best and largest studies; NS, not statistically significant; no data, no available data; PPRM, premature preterm rupture of membranes.

G grade of recommendation: A, consistent level 1 studies; B, consistent level 2 or 3 studies or extrapolations from level 1 studies; C, level 4 studies or extrapolations from level 2 or 3 studies; D, level 5 evidence or troublingly inconsistent or inconclusive studies of any level.

<sup>1</sup>Bhattacharya *et al.* (2008).

<sup>2</sup>Buchmayer *et al.* (2004), VPTD < 32 weeks.

<sup>3</sup>Paz *et al.* (1992).

<sup>4</sup>Thom *et al.* (1992).

<sup>5</sup>Sheiner *et al.* (2005), severe pre-eclampsia.

<sup>6</sup>Basso *et al.* (1998).

<sup>7</sup>Hammoud *et al.* (2007), calculated OR.

<sup>8</sup>EUROPE study, Ancel *et al.* (2004).

<sup>9</sup>Smith *et al.* (2006).

<sup>10</sup>EPIPAGE study, Moreau *et al.* (2005), VPTD < 32 weeks.

<sup>11</sup>Reime *et al.* (2008).

<sup>12</sup>Linn *et al.* (1983).

<sup>13</sup>Lumley (1986).

### Obstetric outcome

Although a previous live birth will reduce the risk of developing PE in a subsequent pregnancy compared with nullipara, this association is not found between a single previous miscarriage and the risk of developing PE, neither in nullipara nor in multipara (Seidman *et al.*, 1989; Eskenazi *et al.*, 1991; Thom *et al.*, 1992; Stone *et al.*, 1994; Eras *et al.*, 2000; Dempsey *et al.*, 2003). In only one small study, a protective effect is described of having had a single previous miscarriage among multiparas (OR 0.1, 95% CI 0.0–0.5) but not among nulliparas (Eskenazi *et al.*, 1991). In a recent well-controlled study, Bhattacharya *et al.*

(2008) even found an increased risk of PE (OR 3.3, 95% CI 2.6–4.6) after a single miscarriage, Thom *et al.* (1992) did not find this increased risk (OR 1.0, 95% CI 0.8–1.3) in a larger but poorly controlled study. After two previous miscarriages, a higher incidence of severe, but not mild, PE (OR 1.5, 95% CI 1.3–1.8) is reported (Sheiner *et al.*, 2005). A single previous miscarriage is not associated with an increased risk for placental abruption and placenta praevia (Schoenbaum *et al.*, 1980; Thom *et al.*, 1992; Bhattacharya *et al.*, 2008), but after two miscarriages, the probability of placental abruption (OR 1.5, 95% CI 1.1–1.7) and placenta praevia (OR 1.7, 95% CI 1.3–2.3) is increased (Sheiner *et al.*, 2005).

**Table II** Early pregnancy events and complications as risk factors for adverse obstetric outcome in the ongoing pregnancy

|                                      | Threatened miscarriage        | G | Intrauterine haematoma         | G | CRL discrepancy               | G | Vanishing twin                | G | Hyperemesis gravidarum         | G |
|--------------------------------------|-------------------------------|---|--------------------------------|---|-------------------------------|---|-------------------------------|---|--------------------------------|---|
| <i>Obstetric outcome</i>             |                               |   |                                |   |                               |   |                               |   |                                |   |
| Antepartum haemorrhage               | OR 1.8 (1.7–2.0) <sup>1</sup> | B | No data                        | D | No data                       | D | NS                            | C | No data                        | D |
| Pregnancy-induced hypertension       | OR 1.4 (1.1–1.8) <sup>2</sup> | B | RR 2.1 (1.5–2.9) <sup>5</sup>  | C | NS                            | C | NS                            | C | NS                             | C |
| Pre-eclampsia                        | OR 1.4 (1.1–1.8) <sup>2</sup> | B | RR 4.0 (2.4–6.7) <sup>5</sup>  | C | No data                       | D | NS                            | C | NS                             | D |
| Placental abruption                  | OR 1.6 (1.1–2.6) <sup>2</sup> | B | RR 5.6 (2.8–11.1) <sup>5</sup> | C | No data                       | D | NS                            | C | No data                        | D |
| Placenta praevia                     | NS                            | B | No data                        | D | No data                       | D | NS                            | C | No data                        | D |
| PPROM                                | NS                            | B | NS                             | D | no data                       | D | no data                       | D | No data                        | D |
| Preterm delivery <37 weeks           | OR 1.3 (1.1–1.7) <sup>2</sup> | B | RR 2.3 (1.6–3.2) <sup>5</sup>  | B | NS                            | C | OR 1.6 (1.2–2.0) <sup>8</sup> | B | RR 3.0 (1.9–4.3) <sup>10</sup> | C |
| Very preterm delivery <34 weeks      | OR 1.9 (1.6–2.2) <sup>1</sup> | B | No data                        | D | OR 2.0 (1.1–4.0) <sup>6</sup> | C | OR 3.0 (1.9–4.8) <sup>8</sup> | B | No data                        | D |
| <i>Perinatal outcome</i>             |                               |   |                                |   |                               |   |                               |   |                                |   |
| Intrauterine growth restriction <5th | No data                       | D | No data                        | D | OR 2.8 (1.9–4.3) <sup>6</sup> | C | No data                       | D | No data                        | D |
| Small for gestational age <10th      | NS                            | B | RR 2.4 (1.4–4.1) <sup>5</sup>  | B | OR 1.1 (1.0–1.2) <sup>7</sup> | B | OR 1.6 (1.1–2.3) <sup>9</sup> | B | RR 1.5 (1.0–2.2) <sup>10</sup> | B |
| Low birthweight <2500 g              | RR 2.3 (1.9–2.7) <sup>3</sup> | B | No data                        | D | OR 1.8 (1.2–2.3) <sup>6</sup> | C | OR 2.0 (1.5–2.6) <sup>8</sup> | B | RR 2.8 (1.7–4.3) <sup>10</sup> | B |
| Very low birthweight <1500 g         | RR 2.2 (1.3–3.5) <sup>3</sup> | B | No data                        | D | No data                       | D | OR 3.0 (1.9–4.7) <sup>8</sup> | B | OR 1.4 (1.0–2.0) <sup>11</sup> | C |
| Congenital malformation              | OR 1.4 (1.0–2.1) <sup>4</sup> | B | NS                             | C | No data                       | D | NS                            | C | Inconclusive <sup>12,13</sup>  | D |
| Low 5-min Apgar score                | NS                            | C | RR 2.6 (1.9–3.5) <sup>5</sup>  | C | No data                       | D | No data                       | D | RR 5.0 (2.6–9.6) <sup>10</sup> | C |
| Intrauterine fetal death             | NS                            | B | NS                             | D | No data                       | D | No data                       | D | NS                             | C |
| Perinatal death                      | NS                            | C | NS                             | D | NS                            | C | OR 3.7 (1.5–8.9) <sup>8</sup> | D | NS                             | C |

Data are reported as odds ratio (OR) or relative risk (RR) with 95% confidence interval (CI) of the best and largest studies; NS, not statistically significant; no data, no available data; PPROM, premature preterm rupture of membranes; CRL crown-rump length.

G grade of recommendation: A, consistent level 1 studies; B, consistent level 2 or 3 studies or extrapolations from level 1 studies; C, level 4 studies or extrapolations from level 2 or 3 studies; D, level 5 evidence or troublingly inconsistent or inconclusive studies of any level.

<sup>1</sup>Wijesiriwardana et al. (2006).

<sup>2</sup>Weiss et al. (2004).

<sup>3</sup>Williams et al. (1991).

<sup>4</sup>Sipilä et al. (1992).

<sup>5</sup>Nagy et al. (2003).

<sup>6</sup>Smith et al. (1998), VPTD <32 weeks.

<sup>7</sup>Bukowski et al. (2007).

<sup>8</sup>Pinborg et al. (2005), calculated OR for perinatal death.

<sup>9</sup>Pinborg et al. (2007).

<sup>10</sup>Dodds et al. (2006), maternal weight gain <7 kg during pregnancy.

<sup>11</sup>Bailit et al. (2005), calculated OR.

<sup>12</sup>Gross et al. (1989).

<sup>13</sup>Bashiri et al. (1995).

In a large population-based Swedish study of 601 883 cases, Buchmayer et al. (2004) found an increased risk of PPROM (OR 1.9, 95% CI 1.5–2.6), PTD (OR 1.1, 95% CI 1.1–1.2) and VPTD (OR 1.5, 95% CI 1.2–2.7) in women presenting with a single previous miscarriage. In other smaller studies, the risk of PPROM was not found to be increased (Thom et al., 1992; Ekwo et al., 1993; El-Bastawissi et al. 2003; Hammoud et al., 2007). An increased risk of PTD has also been reported in other studies (Pickering and Forbes, 1985; Pickering

and Deeks, 1991; Lang et al., 1996; Basso et al., 1998; Smith et al., 2006; Hammoud et al., 2007; Bhattacharya et al., 2008), although not always reaching statistical significance (Schoenbaum et al., 1980; Lekea-Karanika et al., 1990; Haas et al., 1991; Thom et al., 1992; Martius et al., 1998; El-Bastawissi et al., 2003; Nguyen et al., 2004). Several large studies have also reported comparable increased risks of VPTD (Basso et al., 1998; Smith et al., 2006; Hammoud et al., 2007), whereas in smaller studies, only a slightly increased risk of

VPTD was reported (Thom *et al.*, 1992; Martius *et al.*, 1998; El-Bastawissi *et al.*, 2003; Bhattacharya *et al.*, 2008). In all studies, the risk of PPROM (OR 1.2, 95% CI 1.1–1.3), PTD (OR 1.6, 95% CI 1.3–1.9) and VPTD (OR 2.7, 95% CI 1.8–4.0) is increased more in women presenting with two or more miscarriages when compared with women with only a single previous miscarriage (Buchmayer *et al.*, 2004; Sheiner *et al.*, 2005).

### Perinatal outcome

Only a slight increase in the risk of SGA (Pickering and Forbes, 1985; Paz *et al.*, 1992; Thom *et al.*, 1992; Lang *et al.*, 1996; Basso *et al.*, 1998) and LBW (Schoenbaum *et al.*, 1980; Paz *et al.*, 1992; Thom *et al.*, 1992; Basso *et al.*, 1998; Bhattacharya *et al.*, 2008) has been reported by several authors in women with a single previous miscarriage. Sheiner *et al.* (2005) has reported no increased risk of LBW in a large population-based Israeli study of 7503 cases presenting with two or more previous miscarriages, whereas Basso *et al.* (1998) has observed an increased risk of SGA (OR 1.4, 95% CI 1.2–1.6) and LBW (OR 1.9, 95% CI 1.5–2.4) in a large population-based Danish study of 5268 cases presenting with two or more miscarriages.

Although it has been suggested that some congenital anomalies were associated with previous miscarriages (Paz *et al.*, 1992) and one study has reported an increased incidence of congenital malformations after two miscarriages (Schoenbaum *et al.*, 1980), this trend was not confirmed by a large study (Thom *et al.*, 1992).

A single previous miscarriage is not associated with a low 5-min Apgar score, but a recent retrospective study has found an increased risk of intrauterine fetal death (OR 1.9, 95% CI 1.1–3.6) and an increased risk of neonatal death (OR 2.2, 95% CI 1.1–4.8) (Schoenbaum *et al.*, 1980; Thom *et al.*, 1992; Bhattacharya *et al.*, 2008). These increased risks were not found in a larger study of two or more miscarriages (Sheiner *et al.*, 2005).

### Recurrent miscarriage

RM is conventionally defined as three or more consecutive miscarriages occurring before 20 weeks GA (Jauniaux *et al.*, 2006). RM occurs in ~1% of fertile couples although higher incidences like 7.4% are observed (Blohm *et al.*, 2008). The predicted risk for a subsequent miscarriage after RM ranges between 8% and 58% depending on the maternal age, the number of previous miscarriages (Brigham *et al.*, 1999; Dawood *et al.*, 2004) and the karyotype of previous miscarriages (Jauniaux *et al.*, 2006). In this review, we focused on idiopathic RM because different treatments of well-established causes of RM such as thrombophilia or diabetes could have a different impact on the rate of complications in subsequent pregnancy. Only one small study fulfilled these criteria (Jivraj *et al.*, 2001), while in all other studies, no differentiation in underlying causes of RM was made.

RM is associated with an increased risk for PE, placental abruption, placenta praevia, PPROM, PTD, SGA, LBW and congenital anomalies (Table I and Supplementary Appendix Table A3).

### Obstetric outcome

Although after two or more miscarriages, a higher risk of PE and placental abruption has been reported in a large study (Sheiner *et al.*, 2005), we did not find additional information about the same risks

in women with RM or about any protective effect of RM for PE (Thom *et al.*, 1992). This might be due to the fact that studies on RM are smaller and have poor stratification and therefore possible bias in comparison to studies on two or more miscarriages.

RM is associated with an increased risk of placenta praevia (RR 6.0, 95% CI 1.6–22.2) in subsequent ongoing pregnancies (Thom *et al.*, 1992). PPROM was associated with RM (Hammoud *et al.*, 2007) and Thom *et al.* (1992) has reported on the association between RM and PTD (RR 1.5, 95% CI 1.1–2.1) and VPTD (RR 2.4, 95% CI 1.4–7.3). Similar increased odds have been reported by others (Lekea-Karanika *et al.*, 1990; Lang *et al.*, 1996; Martius *et al.*, 1998; Jivraj *et al.*, 2001; Hammoud *et al.*, 2007). The risk of PTD is increased by 25% after four or more previous miscarriages (Lekea-Karanika *et al.*, 1990; Hammoud *et al.*, 2007).

### Perinatal outcome

The relationship between two or more miscarriages and SGA (OR 1.4, 95% CI 1.2–1.6) found in a large population-based Danish study has already been mentioned in the previous paragraph on previous miscarriage (Basso *et al.*, 1998). Other smaller studies have reported similar, although not statistically significant, increased risks of SGA in women with RM compared with controls (Hughes *et al.*, 1991; Thom *et al.*, 1992; Lang *et al.*, 1996; Jivraj *et al.*, 2001).

In a large case–control study, an increased risk of LBW (RR 2.0, 95% CI 1.4–2.8) has been reported in women with RM (Thom *et al.*, 1992) and a similar trend has been reported in smaller studies (Hughes *et al.*, 1991; Lekea-Karanika and Tzoumaka-Bakoula, 1994). The finding that women presenting with RM had themselves been born with a decreased mean birthweight and an increased rate of preterm birth compared with controls suggests that the predisposition of PTD and LBW may be a genetically determined trait among women with RM (Christiansen *et al.*, 1992).

Women with a history of RM may have a higher risk to deliver a child with congenital malformations (RR 1.8, 95% CI 1.1–3.0) than normal controls (Thom *et al.*, 1992). No relationship has been found between RM and low 5-min Apgar score or intrauterine fetal death or perinatal death (Hughes *et al.*, 1991; Thom *et al.*, 1992; Jivraj *et al.*, 2001).

### Termination of pregnancy

Legal abortion is defined as a surgical or medical TOP before 24 weeks GA (Farquharson *et al.*, 2005). Worldwide every 12–39 women/1000 women have a TOP and 31 TOPs are conducted for every 100 live births (Sedgh *et al.*, 2007). TOP rates are lower in Western Europe than in Eastern Africa and Eastern Asia (Sedgh *et al.*, 2007) due to better access to family planning and contraception. In developed countries, the commonly used procedure for first trimester TOP has been a vacuum aspiration. In the last decade, medical abortion with mifepristone and misoprostol has been increasingly used for pregnancies before 10 weeks gestation, whereas for second trimester TOP, the use of surgical versus medical techniques has been highly variable in different countries and regions of a same country. In a most recent large long-term safety study, no difference in the risk of miscarriage, ectopic pregnancy, PTD and LBW has

been observed between a previous TOP by medical technique or by vacuum aspiration, respectively (Virk et al., 2007).

Analysing the adverse pregnancy outcomes following a TOP is difficult because of considerable variations in the type of procedure used, the GA at the time of TOP, the number of previous TOP and the choice of an adequate control group (Atrash and Hogue, 1990). Furthermore TOP and adverse pregnancy outcome share health behavioural pregnancy risk factors such as smoking, substance abuse, unemployment and a poor socio-economic status (Robinson et al., 2001; Raatikainen et al., 2006). Besides these confounders, the associations found between previous TOP and adverse obstetric outcome could be explained by a short interpregnancy interval, cervical damage due to cervix-dilatation, the surgical method used, GA at TOP, infection related to the procedure and tissue retention (Zhou et al., 1999, 2002). Most studies evaluating the risk of adverse pregnancy outcome in women with a history of TOP are of small size, have mixed spontaneous miscarriage and voluntary TOP and insufficiently correct for selection bias.

Despite these methodological drawbacks, it can be concluded that a history of TOP is associated with an increased risk for PPROM, PTD and VPTD. These risks depend on the number of TOP (Table I, and Supplementary Appendix Tables A4 and A5).

## Obstetric outcome

After a history of TOP, no increased risk of PIH has been found (Eras et al., 2000). In four small studies, a low risk of PE has been found after a single TOP, similar to the low risk observed in multipara (Linn et al., 1983; Seidman et al., 1989; Stone et al., 1994; Eras et al., 2000), but a high risk of PE has been found in three small studies (Eskenazi et al., 1991; Dempsey et al., 2003; Raatikainen et al., 2006). After two or more TOP, similar risks of PE have been found (Linn et al., 1983; Eras et al., 2000; Dempsey et al., 2003; Raatikainen et al., 2006). In the EUROPE study, a history of TOP has been associated with placenta praevia (OR 2.3, 95% CI 1.3–4.0) but not with placental abruption (Ancel et al., 2004). However, in a larger case–control study, no association was found between TOP and placenta praevia, even after two or more TOP (Zhou et al., 2001).

In both the EUROPE and the EPIPAGE study, an increased risk of PPROM (OR 1.4, 95% CI 1.1–1.7 and OR 1.7, 95% CI 1.2–2.5) has been found (Ancel et al., 2004; Moreau et al., 2005, <32 weeks). The risk of PPROM is increased more (OR 1.9, 95% CI 1.3–2.9) in women presenting with two or more TOP (Linn et al., 1983). An increased risk for PTD (OR ranging 1.2–1.8) and VPTD (OR ranging 1.1–1.8) has been reported in subsequent large studies (Pickering and Forbes, 1985; Pickering and Deeks, 1991; Lang et al., 1996; Martius et al., 1998; Zhou et al., 1999; Nguyen et al., 2004; Moreau et al., 2005; Smith et al., 2006; Reime et al., 2008) and small studies (Henriet and Kaminski, 2001; El-Bastawissi et al., 2003; Ancel et al., 2004; Raatikainen et al., 2006). The rise in risk of PTD and VPTD is directly related to the number of previous TOP. In women with two or more TOP, the risk of PTD (OR ranging 1.2–2.5) and VPTD (OR ranging 1.4–2.9) is further increased (Pickering and Forbes, 1985; Lopes et al., 1991; Lang et al., 1996; Martius et al., 1998; Zhou et al., 1999; Henriet and Kaminski, 2001; El-Bastawissi et al., 2003; Ancel et al., 2004; Nguyen et al., 2004; Moreau et al., 2005; Raatikainen et al., 2006; Smith et al., 2006).

## Perinatal outcome

In none of the studies was an association observed between one or more previous TOP and SGA, LBW, intrauterine fetal death, perinatal death, low 5-min Apgar score or congenital malformations (Schoenbaum et al., 1980; Linn et al., 1983; Pickering and Forbes, 1985; Seidman et al., 1988; Lopes et al., 1991; Mandelson et al., 1992; Lekea-Karanika and Tzoumaka-Bakoula, 1994; Lang et al., 1996; Henriet and Kaminski, 2001; Moreau et al., 2005; Raatikainen et al., 2006; Parazzini et al., 2007; Reime et al., 2008). Though two small and poor controlled studies found an association between one or more TOP and VLBW (Lumley, 1986; Reime et al., 2008).

One study has reported only a higher risk of intrauterine fetal death in women whose TOP had been complicated by an infection (Zhou and Olsen, 2003).

## Threatened miscarriage

First trimester vaginal bleeding is the most common complication of pregnancy, occurring in 14–20% of ongoing pregnancies, whereas ~50% of these women will miscarry regardless of ultrasonographic evaluation of viability (Farrell and Owen, 1996; Everett, 1997; Weiss et al., 2004; Johns and Jauniaux, 2006; Wijesiriwardana et al., 2006). The risk of threatened miscarriage to proceed to full miscarriage depends on GA and is diminished to 2–14% after confirmation of viability (Weiss et al., 2004; Schauburger et al., 2005; Johns and Jauniaux, 2006). An association between vaginal bleeding in the first trimester and an adverse perinatal outcome has been established for several decades (Jouppila and Koivisto, 1974; Williams et al., 1991). The majority of these older publications report on small retrospective and non-controlled studies and there are only a few state-of-the-art prospective studies available for analysis (Strobino and Pantel-Silverman, 1989; Sipilä et al., 1992; Weiss et al., 2004; Johns and Jauniaux, 2006).

Vaginal bleeding during early pregnancy most often originates from the placenta. It is thought that bleeding between the chorionic membrane and the uterine wall can result in a spectrum of effects on pregnancy development and outcome. At one end, direct pressure and disruption of the placental bed can result in miscarriage. At the other end of the spectrum is placental abruption, placenta praevia, PPROM, LBW, PTD and fetal death, where there is minimal or no disruption to uteroplacental development but a chronic inflammatory reaction within the decidua and placental membranes, with weakening and eventual rupture of the membranes or resulting in myometrial activity (Johns and Jauniaux, 2006).

Threatened miscarriage in the first trimester is associated with an increased risk of APH, placental abruption, placenta praevia, PPROM, PTD, LBW and VLBW (Table II and Supplementary Appendix Table A6), and these risks are more increased in women presenting with heavy bleeding.

## Obstetric outcome

First trimester vaginal bleeding gives a 2-fold increased risk of APH in the second and third trimester of pregnancy (Mulik et al., 2004; De Sutter et al., 2006; Wijesiriwardana et al., 2006). Women with first trimester bleeding are not at an increased risk of developing PIH and PE

(Johns *et al.*, 2003; Weiss *et al.*, 2004; Johns and Jauniaux, 2006; Wijesiriwardana *et al.*, 2006).

In large prospective cohort study, threatened miscarriage was found to be a risk factor for placental abruption, after a light bleeding (OR 1.6, 95% CI 1.1–2.6) as well as after a heavy bleeding (OR 3.6, 95% CI 1.6–7.9) (Weiss *et al.*, 2004). A comparable increased risk of placental abruption (OR 2.8, 95% CI 2.0–3.7) was also observed in a large retrospective case–control study (Mulik *et al.*, 2004) and in another study (Wijesiriwardana *et al.*, 2006). The risk of placenta praevia in threatened miscarriage is increased (OR 1.8, 95% CI 1.1–2.9) in a large retrospective study (Wijesiriwardana *et al.*, 2006). In a subgroup with heavy bleeding of a prospective study, the same risk is increased (OR 2.5, 95% CI 0.9–6.9), however not significantly (Weiss *et al.*, 2004).

Women presenting with heavy bleeding are at higher risk of SGA (OR 2.6, 95% CI 1.2–5.6) (Weiss *et al.*, 2004), whereas women with light bleeding are not at increased risk (Sipilä *et al.*, 1992; Johns *et al.*, 2003; Weiss *et al.*, 2004; De Sutter *et al.*, 2006). In almost all studies, a 1.9–3.7-fold increased risk of PPROM is observed (Hertz and Heisterberg, 1985; Weiss *et al.*, 2004; Yang *et al.*, 2004; De Sutter *et al.*, 2006; Johns and Jauniaux, 2006) except in one (Wijesiriwardana *et al.*, 2006). An increased risk of PTD (RR ranging 1.3–3.1) and VPTD (RR ranging 1.6–5.3) is found in all studies after threatened miscarriage, in both normal and IVF pregnancies (Funderburk *et al.*, 1980; Hertz and Heisterberg, 1985; Strobino and Pantel-Silverman, 1989; Williams *et al.*, 1991; Sipilä *et al.*, 1992; Das *et al.*, 1996; Johns *et al.*, 2003; Mulik *et al.*, 2004; Nguyen *et al.*, 2004; Weiss *et al.*, 2004; Yang *et al.*, 2004; De Sutter *et al.*, 2006; Johns and Jauniaux, 2006; Wijesiriwardana *et al.*, 2006). The risk of PTD is increased more (OR 3.0, 95% CI 1.9–4.5) after heavy first trimester bleeding (Strobino and Pantel-Silverman, 1989; Nguyen *et al.*, 2004; Weiss *et al.*, 2004).

## Perinatal outcome

Overall, the mean birthweight after threatened miscarriage is lower than in controls (Das *et al.*, 1996; Weiss *et al.*, 2004; De Sutter *et al.*, 2006; Johns and Jauniaux, 2006). An increased risk of LBW (RR 2.3, 95% CI 1.9–2.7) and of VLBW (RR 2.2, 95% CI 1.3–3.5) was observed in a large prospective study (Williams *et al.*, 1991) as well as in a large retrospective study (Wijesiriwardana *et al.*, 2006). Similar increased risks of LBW and VLBW have also been reported in other small studies although not always reaching statistical significance (Funderburk *et al.*, 1980; Hertz and Heisterberg, 1985; Strobino and Pantel-Silverman, 1989; Sipilä *et al.*, 1992; Lekea-Karanika and Tzoumaka-Bakoula, 1994; Das *et al.*, 1996; Mulik *et al.*, 2004; De Sutter *et al.*, 2006).

Other perinatal outcomes like low 5-min Apgar score, intrauterine fetal deaths and perinatal deaths seem to be unaffected, but the risk of congenital malformation (OR 1.4, 95% CI 1.0–2.1) seems to be increased (Funderburk *et al.*, 1980; Hertz and Heisterberg, 1985; Strobino and Pantel-Silverman, 1989; Williams *et al.*, 1991; Sipilä *et al.*, 1992; Das *et al.*, 1996; Mulik *et al.*, 2004; De Sutter *et al.*, 2006; Johns and Jauniaux, 2006; Wijesiriwardana *et al.*, 2006).

## Intrauterine haematoma

IUHs are crescent-shaped echolucent areas between the chorionic membrane or placenta and the myometrium (Mantoni and Pedersen,

1981; Pearlstone and Baxi, 1993). In ~18–39% of the women presenting with threatened miscarriage, a subchorionic or retroplacental haematoma can be seen on ultrasound (Pedersen and Mantoni, 1990a; Johns *et al.*, 2003). Seventy per cent of the women diagnosed with an IUH by ultrasound will experience vaginal bleeding (Ball *et al.*, 1996; Nagy *et al.*, 2003). An acute haemorrhage is hyperechogenic to isoechochogenic compared with the placenta, while resolving haematomas become hypoechogenic within 1 week and sonolucent within 2 weeks (Nyberg *et al.*, 1987). Persistence of a first trimester subchorionic haematoma does not affect the utero- and umbilico-placental circulation.

The risk of miscarriage is independent of vaginal bleeding, the size and the localization of the IUH; however, the risk is 2.4-fold higher when the haematoma is diagnosed before 9 weeks gestation (Pedersen and Mantoni, 1990a; Maso *et al.*, 2005; Leite *et al.*, 2006). An IUH during early pregnancy most often originates from the placenta. The putative mechanisms of the association of an IUH and adverse obstetric outcome are similar as described in the threatened miscarriage chapter.

An IUH is associated with an increased risk for PIH, PE, placental abruption, PTD, SGA, fetal distress and intrauterine fetal death (Table II and Supplementary Appendix Table A7).

## Obstetric outcome

Women presenting with a first trimester IUH have a higher risk of PIH (RR 2.1, 95% CI 1.5–2.9), PE (RR 4.0, 95% CI 2.4–6.7), placental abruption (RR 5.6, 95% CI 2.8–11.1) and SGA (RR 2.4, 95% CI 1.4–4.1) in comparison with women without an IUH and vaginal bleeding (Nagy *et al.*, 2003). An increased risk of placental abruption and SGA was also observed in other studies (Ball *et al.*, 1996; Johns *et al.*, 2003).

The risk of PPROM was not increased in women with an IUH (Ball *et al.*, 1996; Johns *et al.*, 2003). The risk of PTD, however, was increased (RR 2.3, 95% CI 1.6–3.2) in a prospective study comparing women with and without an IUH (Nagy *et al.*, 2003). The increased PTD risk appeared independent of vaginal bleeding and was comparable with risks observed in other studies (Pedersen and Mantoni, 1990a; Ball *et al.*, 1996; Mäkikallio *et al.*, 2001; Johns *et al.*, 2003). From older studies, it is known that there is no association between the observed incidence of premature delivery and the size of the haematoma (Pedersen and Mantoni, 1990b).

IUH specific data on LBW or VLBW were unavailable. The risks of congenital anomalies and perinatal death were not significantly increased in these women (Ball *et al.*, 1996; Nagy *et al.*, 2003). Fetal distress has been observed more frequently (RR 2.6, 95% CI 1.9–3.5) in these women when compared with a control group (Nagy *et al.*, 2003), as well as intrauterine fetal death (OR 2.8, 95% CI 1.7–2.4, Ball *et al.*, 1996).

## Crown-rump length discrepancy

The classical Robinson and Fleming study on CRL is still the main reference for the assessment of GA in early pregnancy (Robinson and Fleming, 1975). Reevaluation of CRL curves based on high-resolution real-time ultrasound only demonstrated small systematic differences (Hadlock *et al.*, 1992). The predictive value of CRL measurements is

illustrated by the fact that if an embryo has developed up to 5 mm in length, subsequent loss of viability occurs in 7.2% and loss rates drop to 3.3% for embryos of 6–10 mm and to 0.5% for embryos over 10 mm (Goldstein, 1994).

A CRL discrepancy exists when the observed CRL is smaller than expected on the basis of amenorrhoea in women with a regular menstrual cycle or known date of ovulation (Reljić, 2001). A CRL discrepancy may be caused by variations in growth rate, sometimes occurring in the preimplantation period and referred to as diapause (Lopes et al., 2004). CRL discrepancy is found in certain types of aneuploidy (Kuhn et al., 1995; Schemmer et al., 1997). The discrepancy is most commonly found in first trimester fetuses with trisomy 13 and 18, and triploidy by contrast to trisomy 21 and monosomy (Kuhn et al., 1995; Goldstein et al., 1996; Bahado-Singh et al., 1997; Jauniaux et al., 1997; Falcon et al., 2005).

In ongoing euploid pregnancies, a CRL discrepancy is associated with VPTD, IUGR, SGA and LBW, in both singleton and twin pregnancies (Table II and Supplementary Appendix Table A8).

## Obstetric outcome

We could not find data on the association between CRL discrepancy and PIH, PE, placenta praevia, placental abruption and PPRM.

A CRL discrepancy of 2–6 days is related to an increased risk of SGA (OR 1.1, 95% CI 1.0–1.2, Bukowski et al., 2007), IUGR (OR 2.8, 95% CI 1.9–4.3) and VPTD before 32 weeks (OR 2.0, 95% CI 1.1–4.0), but it was not related to PIH nor to PTD between 33 and 36 weeks (Smith et al., 1998). Adverse pregnancy outcome has also been observed in cases presenting with a growth discrepancy of >14 days at the mid-second trimester ultrasound examination (Nakling and Backe, 2002). Furthermore in exactly dated pregnancies, conceived by assisted reproductive technology (ART), a strong association has been observed between fetal growth in first trimester and birthweight, suggesting that impairment of fetal growth starts in the first trimester (Smith, 2004; Bukowski et al., 2007; Leung et al., 2008).

A CRL discrepancy of 2–6 days smaller than expected is related to an increased risk of LBW (OR 1.7, 95% CI 1.2–2.3), but not to perinatal death (Smith et al., 1998). No data are available on the relationship between CRL discrepancy and low 5-min Apgar score, intrauterine fetal death and congenital malformation.

## Intertwin disparities in fetal size

Intertwin disparity can be observed in both monochorionic and dichorionic twin pregnancies (Sebire et al., 1998). It has been a matter of debate whether the smaller or the larger fetus should be used to determine the GA (Kalish et al., 2003; Salomon et al., 2005). Although one study did not find an increased risk of adverse pregnancy outcomes in twins with first trimester CRL discordance (Banks et al., 2008), other studies have observed an increased risk of congenital malformation, aneuploidy, PTD, SGA, IUGR and intertwin birthweight discordance of >20–25% when a cut-off value of >85th–95th percentile was used (Weissman et al., 1994; Kalish et al., 2003; Bartha et al., 2005; Salomon et al., 2005; Tai and Grobman, 2007). No association has been found between CRL discordance and twin-to-twin transfusion syndrome in monochorionic twin pregnancies (El Kateb et al., 2007).

## Vanishing twin

The disappearance of gestational sacs or embryos after documented fetal heart activity in multiple pregnancies is known as the vanishing twin phenomenon (Jauniaux et al., 1988). Among pregnancies with twin sacs or embryos, ~30% will result in singletons and <10% will result in no fetuses at all (Landy and Keith, 1998; Dickey et al., 2002; Pinborg et al., 2005).

Increased levels of pregnancy-associated plasma protein-A (PAPP-A) and free  $\beta$ -human chorionic gonadotrophin ( $\beta$ -hCG), potentially influencing the results of first trimester screening, have been reported in vanishing twin ART pregnancies compared with spontaneous conceived pregnancies (Chasen et al., 2006b). But, a more recently performed study did not find a difference in PAPP-A and  $\beta$ -hCG levels when vanishing twin pregnancies were compared with singleton ART population (Gjerris et al., 2009).

Compared with uncomplicated control ART-pregnancies with the same number of viable fetuses, there is an increase in adverse obstetrical outcome after the vanishing twin/triplet phenomenon. This might be due to early implantation crowding, resulting in an unfavourable implantation site with uteroplacental insufficiency (Depp et al., 1996), vaginal blood loss being an independent risk factor (De Sutter et al., 2006; Pinborg et al., 2007).

Although the vanishing phenomenon occurs in both spontaneously conceived and in ARTs pregnancies, the vanishing twin phenomenon described in the following studies is performed in ART-population for both cases and controls. The vanishing twin phenomenon is associated with PTD, VPTD, SGA, LBW and VLBW (Table II and Supplementary Appendix Table A9).

## Obstetric outcome

An association with an increased risk of PE has been observed in a small study on vanishing twins (Chasen et al., 2006a) but not confirmed by a larger study (Pinborg et al., 2007). No difference is found for the risk of vaginal bleeding, placenta praevia and placental abruption, but an increased risk of SGA (OR 1.6, 95% CI 1.1–2.3) has been observed in comparison with singletons from a single gestation (Pinborg et al., 2007) and the risk increased with increasing GA at the time of vanishing. An association between vanishing twin with PTD has been observed by several authors (Dickey et al., 2002; La Sala et al., 2004; Pinborg et al., 2005; Chasen et al., 2006a; Shebl et al., 2008). An increased risk of PTD (OR 1.6, 95% CI 1.2–2.0) and VPTD before 32 weeks gestation (OR 3.0, 95% CI 1.9–4.8) has been found comparing survivors with singletons (Pinborg et al., 2005). The increased risks are almost entirely due to vanishing twins that occurred after 8 weeks gestation (Pinborg et al., 2005).

An increased risk of LBW (OR 2.0, 95% CI 1.5–2.6) and VLBW (OR 3.0, 95% CI 1.9–4.7) after a vanishing twin (Pinborg et al., 2005, 2007) has also been reported by several other studies (Dickey et al., 2002; La Sala et al., 2004; Shebl et al., 2008).

No difference has been found in the incidence of congenital malformations and perinatal death (Pinborg et al., 2005; Shebl et al., 2008). Though, in IVF/ICSI pregnancies, an increased risk of cerebral palsy in those children resulting from pregnancies, where the number of embryos transferred was higher than the number of children born, has been reported (Hvidtjørn et al., 2005). This association has not been found in vanishing twin pregnancies (Pinborg et al., 2005).



## Hyperemesis gravidarum

HG is characterized by intractable nausea and vomiting leading to dehydration, electrolyte and metabolic disturbances, nutritional deficiency and weight loss. HG complicates 0.3–1.5% of all pregnancies, and in spite of extensive research during the last 4 decades, the aetiology of HG remains unknown (Verberg *et al.*, 2005). As a consequence, therapy and patient care remain empirical and symptomatic.

In women with nausea during pregnancy, the probability of miscarriage is decreased (OR 0.3, 95% CI 0.2–0.3) and this is directly linked with the severity of symptoms (Maconochie *et al.*, 2007). Also adverse obstetric outcome is linked with the severity of the symptoms. The adverse obstetric outcome is mostly limited to women with a poor maternal weight gain during pregnancy (Dodds *et al.*, 2006). This suggests that deficient malnutrition and the lack of vitamins and oligo-elements could play a role in these associations.

Severe hyperemesis is associated with PTD, SGA, LBW, low 5-min Apgar score and possibly also with fetal congenital anomalies (Table II and Supplementary Appendix Table A10).

### Obstetric outcome

There are many observations about an increased incidence of female neonates (53–66%) in pregnancies complicated by HG (Schiff *et al.*, 2004).

Women with HG do not present with a higher risk to develop PIH and PE (Bashiri *et al.*, 1995; Dodds *et al.*, 2006). Infants of mothers with HG have a higher PTD risk, as well as a higher risk for LBW and VLBW, and these neonates are more likely to be SGA (Bashiri *et al.*, 1995; Bailit, 2005; Dodds *et al.*, 2006). The increased risks are probably due to the low pregnancy weight gain (<7 kg during pregnancy) because it has been demonstrated that women with HG and >7 kg weight gain during pregnancy do not have an increased risk of PTD, LBW, VLBW and SGA (Gross *et al.*, 1989; Vilming and Nesheim, 2000; Dodds *et al.*, 2006). Other studies, evaluating the effect of only low maternal weight gain during pregnancy on pregnancy outcome, have also found an increased risk of PTD, LBW and VLBW (Ehrenberg *et al.*, 2003; DeVader *et al.*, 2007; Tsukamoto *et al.*, 2007). In a large retrospective study on women with HG and a low weight gain of <7 kg, an increased risk of PTD (RR 3.0, 95% CI 1.9–4.3), SGA (RR 1.5, 95% CI 1.0–2.2), LBW (RR 2.8, 95% CI 1.7–4.3) and low 5-min Apgar score (RR 5.0, 95% CI 2.6–9.6) has been found compared with normal pregnancies (Dodds *et al.*, 2006).

There are only a few data on the increased risk of congenital anomalies in HG women (Gross *et al.*, 1989; Hod *et al.*, 1994; Hallack *et al.*, 1996; Kawamura *et al.*, 2008). There is an increased risk of anomalies of the central nervous system and skeletal malformations most likely due to nutritional deficiencies in oligo-elements and vitamins such as folic acid and vitamin K. No difference has been found in the incidence of intrauterine fetal death and perinatal death (Bashiri *et al.*, 1995; Hallack *et al.*, 1996; Tsang *et al.*, 1996; Bailit, 2005; Dodds *et al.*, 2006).

## Pregnancy with an IUD

IUDs are widely used as contraceptives. A cumulative pregnancy rate of <2% for a copper IUD and ~1% for a levonorgestrel-releasing IUD

has been reported (Thonneau *et al.*, 2001). Dislocation of the IUD is frequently observed in pregnant women with an IUD (Inal *et al.*, 2005).

Pregnancies developing with an IUD *in situ* are associated with an increased risk of early and late miscarriage and PTD.

### Obstetric outcome

A few studies have found that ongoing pregnancies with an IUD left *in situ* have a 2-fold increase in the risk of early and late miscarriage (50–57%) and a 4-fold increase in risk of PTD (17–22%), compared with controls in which the IUD is removed in first trimester (Tatum *et al.*, 1976; Koetsawang *et al.*, 1977). It is advised to remove the IUD with visible strings, as following removal of the IUD, the chance of miscarriage (20–25%) and PTD (4–6%) is decreased (Tatum *et al.*, 1976; Koetsawang *et al.*, 1977). If the strings of the IUD are not visible, it can be considered to remove the IUD under ultrasound guidance or by hysteroscopy (Kirkinen *et al.*, 1992; Schiesser *et al.*, 2004). These are observational studies and there are no RCTs comparing obstetric outcome in IUD *in situ* or after removal of an IUD and controls.

Intrauterine exposure to copper is not associated with any known teratogenic effect (Tatum *et al.*, 1976; Barash *et al.*, 1990). Teratogenic effects of a levonorgestrel-releasing IUD have not been reported.

## Conclusions

In this comprehensive review, we describe the impact of various specific first trimester events and complications for adverse effects on pregnancy outcome in second or third trimester of pregnancy. A few of these associations are based on large good-controlled population-based or prospective studies. Though many studies describing the impact of a single first trimester complication are small, retrospective series, have poor stratification bias and poor matching of cases and controls. Many of the controlled studies did not make adjustments for all known relevant confounders for adverse obstetric outcome, such as age, ART, economical status, education level, ethnicity, length, marital status, parity, previous obstetric outcome, prolonged infertility smoking and maternal weight or did not stratify for other first trimester complications. More large controlled studies, using local National Birth Registries, are needed to confirm our findings. In particular, larger studies concerning the risk of adverse late pregnancy outcome in women presenting with idiopathic RM, IUH and CRL discrepancy are needed.

Data from our literature review indicate a strong association between specific early pregnancy events and subsequent late obstetric complications in the subsequent or ongoing pregnancy. In particular, the risk of PTD and VPTD is increased after any of these first trimester complications. In all specific early pregnancy complications, the increased risks of late obstetric complications are related to the severity and/or to the recurrence of the first trimester complication. Though some of the found associations are small (between OR 1.0 and 2.0) and thus the clinical relevance of these associations could be questionable.

Clinically relevant associations (grade of recommendation A, B or C) of adverse obstetric and perinatal outcome in the subsequent pregnancy with an OR > 2.0 after complications in a previous pregnancy are the risk of perinatal death after a single previous miscarriage, the

risk of VPTD after two or more miscarriages, the risk of placenta praevia, PPROM, VPTD and LBW after RM and the risk of VPTD after two or more TOP. Clinically relevant associations (grade of recommendation A, B or C) of adverse obstetric and perinatal outcome in the ongoing pregnancy with an OR > 2.0 after complications in the index pregnancy are the risk of LBW and VLBW after a threatened miscarriage, the risk of PIH, PE, placental abruption, PTD, SGA and low 5-min Apgar score after detection of an IUH, the risk of VPTD and IUGR after a CRL discrepancy, the risk of VPTD, LBW and VLBW after a vanishing twin phenomenon and the risk of PTD, LBW and low 5-min Apgar score in a pregnancy complicated by severe HG. The identification of these high risk groups should enable better management protocols and new therapeutic protocols to improve neonatal outcome.

## Supplementary data

Supplementary data are available at <http://humupd.oxfordjournals.org/>.

## Acknowledgements

We thank Prof. G.J. Bonsel, PhD, Institute of Health Policy and Management (iBMG), Erasmus University Medical Center, The Netherlands, for his critical reading of the manuscript and his advice.

## References

- Ancel PY, Lelong N, Papiernik E, Saurel-Cubizolles MJ, Kaminski M. History of induced abortion as a risk factor for preterm birth in European countries: results of the EUROPOP survey. *Hum Reprod* 2004;**19**:734–740.
- Atrash HK, Hogue CJ. The effect of pregnancy termination on future reproduction. *Baillieres Clin Obstet Gynaecol* 1990;**4**:391–405.
- Bahado-Singh RO, Lynch L, Deren O, Morroti R, Copel JA, Mahoney MJ, Williams J 3rd. First-trimester growth restriction and fetal aneuploidy: the effect of type of aneuploidy and gestational age. *Am J Obstet Gynecol* 1997;**176**:976–980.
- Bailit JL. Hyperemesis gravidarum: epidemiologic findings from a large cohort. *Am J Obstet Gynecol* 2005;**193**:811–814.
- Ball RH, Ade CM, Schoenborn JA, Crane JP. The clinical significance of ultrasonographically detected subchorionic hemorrhages. *Am J Obstet Gynecol* 1996;**174**:996–1002.
- Banks CL, Nelson SM, Owen P. First and third trimester ultrasound in the prediction of birthweight discordance in dichorionic twins. *Eur J Obstet Gynecol Reprod Biol* 2008;**138**:34–38.
- Barash A, Shoham Z, Borenstein R, Nebel L. Development of human embryos in the presence of a copper intrauterine device. *Gynecol Obstet Invest* 1990;**29**:203–206.
- Bartha JL, Ling Y, Kyle P, Soothill PW. Clinical consequences of first-trimester growth discordance in twins. *Eur J Obstet Gynecol Reprod Biol* 2005;**119**:56–59.
- Bashiri A, Neumann L, Maymon E, Katz M. Hyperemesis gravidarum: epidemiologic features, complications and outcome. *Eur J Obstet Gynecol Reprod Biol* 1995;**63**:135–138.
- Basso O, Olsen J, Christensen K. Risk of preterm delivery, low birthweight and growth retardation following spontaneous abortion: a registry-based study in Denmark. *Int J Epidemiol* 1998;**27**:642–646.
- Bhattacharya S, Townend J, Shetty A, Campbell D, Bhattacharya S. Does miscarriage in an initial pregnancy lead to adverse obstetric and perinatal outcomes in the next continuing pregnancy? *Br J Obstet Gynaecol* 2008;**115**:1623–1629.
- Blohm F, Fridén B, Milsom I. A prospective longitudinal population-based study of clinical miscarriage in an urban Swedish population. *Br J Obstet Gynaecol* 2008;**115**:176–183.
- Børstum KG, Thomsen A, Clausen I, Eriksen G. Long-term prognosis of pregnancies in women with intrauterine hematomas. *Obstet Gynecol* 1989;**74**:231–233.
- Brigham SA, Conlon C, Farquharson RG. A longitudinal study of pregnancy outcome following idiopathic recurrent miscarriage. *Hum Reprod* 1999;**14**:2868–2871.
- Buchmayer SM, Sparén P, Cnattingius S. Previous pregnancy loss: risks related to severity of preterm delivery. *Am J Obstet Gynecol* 2004;**191**:1225–1231.
- Bukowski R, Smith GC, Malone FD, Ball RH, Nyberg DA, Comstock CH, Hankins GD, Berkowitz RL, Gross SJ, Dugoff L et al. FASTER Research Consortium. Fetal growth in early pregnancy and risk of delivering low birth weight infant: prospective cohort study. *Br Med J* 2007;**334**:836–840.
- Chasen ST, Luo G, Perni SC, Kalish RB. Are in vitro fertilization pregnancies with early spontaneous reduction high risk? *Am J Obstet Gynecol* 2006a;**195**:814–817.
- Chasen ST, Perni SC, Predanic M, Kalish RB, Chervenak FA. Does a 'vanishing twin' affect first-trimester biochemistry in Down syndrome risk assessment? *Am J Obstet Gynecol* 2006b;**195**:236–239.
- Christiansen OB, Mathiesen O, Lauritsen JG, Grunnet N. Study of the birthweight of parents experiencing unexplained recurrent miscarriages. *Br J Obstet Gynaecol* 1992;**99**:408–411.
- Das AG, Gopalan S, Dhaliwal LK. Fetal growth and perinatal outcome of pregnancies continuing after threatened abortion. *Aust N Z Obstet Gynaecol* 1996;**36**:135–139.
- Dawood F, Farquharson R, Quenby S. Recurrent miscarriage. *Current Obstet Gynaecol* 2004;**14**:247–253.
- Dempsey JC, Sorensen TK, Qiu CF, Luthy DA, Williams MA. History of abortion and subsequent risk of preeclampsia. *J Reprod Med* 2003;**48**:509–514.
- Depp R, Macones GA, Rosenn MF, Turzo E, Wapner RJ, Weinblatt VJ. Multifetal pregnancy reduction: evaluation of fetal growth in the remaining twins. *Am J Obstet Gynecol* 1996;**174**:1233–1238.
- De Sutter P, Bontinck J, Schutyers V, Van der Elst J, Gerris J, Dhont M. First-trimester bleeding and pregnancy outcome in singletons after assisted reproduction. *Hum Reprod* 2006;**21**:1907–1911.
- DeVader SR, Neeley HL, Myles TD, Leet TL. Evaluation of gestation weight gain guidelines for women with normal prepregnancy body mass index. *Obstet Gynecol* 2007;**110**:745–751.
- Dickey RP, Sartor BM, Pyrzak R. What is the most relevant standard of success in assisted reproduction? No single outcome is satisfactory when evaluating success in assisted reproduction; both twin births and singleton births should be counted as successes. *Hum Reprod* 2004;**19**:783–787.
- Dickey RP, Taylor SN, Lu PY, Sartor BM, Stormont JM, Rye PH, Pelletier WD, Zender JL, Matulich EM. Spontaneous reduction of multiple pregnancy: incidence and effect on outcome. *Am J Obstet Gynecol* 2002;**186**:77–83.
- Dodds L, Deshayne BF, Joseph KS, Allen VM, Butler B. Outcomes of pregnancies complicated by hyperemesis gravidarum. *Obstet Gynecol* 2006;**107**:285–292.
- Ehrenberg HM, Dierker L, Milluzzi C, Mercer BM. Low maternal weight, failure to thrive in pregnancy and adverse pregnancy outcomes. *Am J Obstet Gynecol* 2003;**189**:1726–1730.

- Ekwo EE, Gosselink CA, Moawad A. Previous pregnancy outcomes and subsequent risk of preterm rupture of amniotic sac membranes. *Br J Obstet Gynecol* 1993;**100**:534–541.
- El-Bastawissi AY, Sorensen TK, Akafo CK, Frederick IO, Xiao R, Williams MA. History of fetal loss and other adverse pregnancy outcomes in relation to subsequent risk of preterm delivery. *Matern Child Health J* 2003;**7**:53–58.
- El Kateb A, Nasr B, Nassar M, Bernard JP, Ville Y. First-trimester ultrasound examination and the outcome of monochorionic twin pregnancies. *Prenat Diagn* 2007;**27**:922–925.
- Eras JL, Saftlas AF, Triche E, Hsu CD, Risch HA, Bracken MB. Abortion and its effect on risk of preeclampsia and transient hypertension. *Epidemiology* 2000;**11**:36–43.
- Eskenazi B, Fenster L, Sidney S. A multivariate analysis of risk factors for preeclampsia. *JAMA* 1991;**266**:237–241.
- Everett C. Incidence and outcome of bleeding before the 20th week of pregnancy: prospective study from general practice. *Br Med J* 1997;**315**:32–34.
- Falcon O, Peralta CF, Cavoretto P, Auer M, Nicolaides KH. Fetal trunk and head volume in chromosomally abnormal fetuses at 11+0 to 13+6 weeks of gestation. *Ultrasound Obstet Gynecol* 2005;**26**:517–520.
- Farquharson RG, Jauniaux E, Exalto N, ESHRE Special Interest Group for Early Pregnancy (SIGEP). Updated and revised nomenclature for description of early pregnancy events. *Hum Reprod* 2005;**20**:3008–3011.
- Farrell T, Owen P. The significance of extrachorionic membrane separation in threatened miscarriage. *Br J Obstet Gynaecol* 1996;**103**:926–928.
- Frank PI, McNamee R, Hannaford PC, Kay CR, Hirsch S. The effect of induced abortion on subsequent pregnancy outcome. *Br J Obstet Gynaecol* 1991;**98**:1015–1024.
- Funderburk SJ, Guthrie D, Meldrum D. Outcome of pregnancies complicated by early vaginal bleeding. *Br J Obstet Gynecol* 1980;**87**:100–105.
- Gjerris AC, Loft A, Pinborg A, Christiansen M, Tabor A. The effect of a 'vanishing twin' on biochemical and ultrasound first trimester screening markers for Down's syndrome in pregnancies conceived by assisted reproductive technology. *Hum Reprod* 2009;**24**:55–62.
- Goldstein SR. Embryonic death in early pregnancy: a new look at the first trimester. *Obstet Gynecol* 1994;**84**:294–297.
- Goldstein SR, Kerenyi T, Scher J, Papp C. Correlation between karyotype and ultrasound findings in patients with failed early pregnancy. *Ultrasound Obstet Gynecol* 1996;**8**:314–317.
- Griebel CP, Halvorsen J, Golemon TB, Day AA. Management of spontaneous abortion. *Am Fam Physician* 2005;**72**:1243–1250.
- Gross S, Librach C, Cecutti A. Maternal weight loss associated with hyperemesis gravidarum: a predictor of fetal outcome. *Am J Obstet Gynecol* 1989;**160**:906–909.
- Haas I, Harlow BL, Cramer DW, Frigoletto FD. Spontaneous preterm birth: a case-control study. *Am J Obstet Gynecol* 1991;**165**:1290–1296.
- Hadlock FP, Shah YP, Kanon DJ, Math B, Lindsey JV. Fetal crown-rump length: re-evaluation of relation to menstrual age (5–18 weeks) with high resolution real time US. *Radiology* 1992;**182**:501–505.
- Hallack M, Tsalamandris K, Dombrowski MP, Isada NB, Pryde PG, Evans MI. Hyperemesis gravidarum; Effects on fetal outcome. *J Reprod Med* 1996;**41**:871–874.
- Hammoud AO, Merhi ZO, Diamond M, Baumann P. Recurrent pregnancy loss and obstetric outcome. *Int J Gynaecol Obstet* 2007;**96**:28–29.
- Henriet L, Kaminski M. Impact of induced abortions on subsequent pregnancy outcome: the 1995 French national perinatal survey. *Br J Obstet Gynaecol* 2001;**108**:1036–1042.
- Hertz JB, Heisterberg L. The outcome of pregnancy after threatened abortion. *Acta Obstet Gynecol Scand* 1985;**64**:151–156.
- Hod M, Orvieto R, Kaplan B, Friedman S, Ovadia J. Hyperemesis gravidarum: a review. *J Reprod Med* 1994;**39**:605–612.
- Hughes N, Hamilton EF, Tulandi T. Obstetric outcome in women after multiple spontaneous abortions. *J Reprod Med* 1991;**36**:165–168.
- Hvidtjærn D, Grove J, Schendel D, Væth M, Ernst E, Nielsen L, Thorsen P. 'Vanishing embryo syndrome' in IVF/ICSI. *Hum Reprod* 2005;**20**:2550–2551.
- Inal MM, Ertopçu K, Ozelmas I. The evaluation of 318 intrauterine pregnancy cases with an intrauterine device. *Eur J Contracept Reprod Health Care* 2005;**10**:266–271.
- Jauniaux E, Elkhazen N, Leroy F, Wilkin P, Rodesch F, Hustin J. Clinical and morphologic aspects of the vanishing twin phenomenon. *Obstet Gynecol* 1988;**72**:577–581.
- Jauniaux E, Brown R, Snijders RJM, Noble P, Nicolaides K. Early prenatal diagnosis of triploidy. *Am J Obstet Gynecol* 1997;**176**:550–554.
- Jauniaux E, Farquharson RG, Christiansen OB, Exalto N. Evidence-based guidelines for the investigation and medical treatment of recurrent miscarriage. *Hum Reprod* 2006;**21**:2216–2222.
- Jivraj S, Anstie B, Cheong YC, Fairlie FM, Laird SM, Li TC. Obstetric and neonatal outcome in women with a history of recurrent miscarriage: a cohort study. *Hum Reprod* 2001;**16**:102–106.
- Johns J, Jauniaux E. Threatened miscarriage as a predictor of obstetric outcome. *Obstet Gynecol* 2006;**107**:845–850.
- Johns J, Hyett J, Jauniaux E. Obstetric outcome after threatened miscarriage with and without a hematoma on ultrasound. *Obstet Gynecol* 2003;**102**:483–487.
- Johnson LG, Mueller BA, Daling JR. The relationship of placenta previa and history of induced abortion. *Int J Gynecol Obstet* 2003;**81**:191–198.
- Jouppila P, Koivisto M. The prognosis in pregnancy after threatened abortion. *Ann Chir Gynaecol Fenn* 1974;**63**:439–444.
- Kalish RB, Chasen ST, Gupta M, Sharma G, Perni SC, Chervenak FA. First trimester prediction of growth discordance in twin gestations. *Am J Obstet Gynecol* 2003;**189**:706–709.
- Kawamura Y, Kawamata K, Shinya M, Higashi M, Niirō M, Douchi T. Vitamin K deficiency in hyperemesis gravidarum as a potential cause of fetal intracranial hemorrhage and hydrocephalus. *Prenat Diagn* 2008;**28**:59–61.
- Kirkinen P, Simojoki M, Kivelä A, Jouppila P. Ultrasound-controlled removal of a dislocated intrauterine device in the first trimester of pregnancy: a report of 26 cases. *Ultrasound Obstet Gynecol* 1992;**2**:345–348.
- Knudsen UB, Hansen V, Juul S, Secher NJ. Prognosis of a new pregnancy following previous spontaneous abortions. *Eur J Obstet Gynecol Reprod Biol* 1991;**39**:31–36.
- Koetsawang S, Rachawat D, Piya-Anant M. Outcome of pregnancy in the presence of intrauterine device. *Acta Obstet Gynecol Scand* 1977;**56**:479–482.
- Kuhn P, Brizot ML, Pandya PP, Snijders RJ, Nicolaides KH. Crown-rump length in chromosomally abnormal fetuses at 10 to 13 weeks' gestation. *Am J Obstet Gynecol* 1995;**172**:32–35.
- Lamb EH. The impact of previous perinatal loss on subsequent pregnancy and parenting. *J Perinat Educ* 2002;**11**:33–40.
- Landy HJ, Keith LG. The vanishing twin: a review. *Hum Reprod Update* 1998;**4**:177–183.
- Lang JM, Lieberman E, Cohen A. A comparison of risk-factors for preterm labor and term small-for-gestational-age birth. *Epidemiology* 1996;**7**:369–376.
- Lao TT, Ho LF. Induced abortion is not a cause of subsequent preterm delivery in teenage pregnancies. *Hum Reprod* 1998;**13**:758–761.
- La Sala GB, Nucera G, Gallinelli A, Nicoli A, Villani MT, Blickstein I. Spontaneous embryonic loss following in vitro fertilization: incidence and effect on outcomes. *Am J Obstet Gynecol* 2004;**191**:741–746.

- Leite J, Ross P, Rossi AC, Jeanty P. Prognosis of very large first-trimester hematomas. *J Ultrasound Med* 2006;**25**:1441–1445.
- Lekea-Karanika V, Tzoumaka-Bakoula C. Past obstetric history of the mother and its association with low birthweight of a subsequent child: a population based study. *Paediatr Perinat Epidemiol* 1994;**8**:173–187.
- Lekea-Karanika V, Tzoumaka-Bakoula C, Golding J. Previous obstetric history and subsequent preterm delivery in Greece. *Eur J Obstet Gynecol Reprod Biol* 1990;**37**:99–109.
- Leung TY, Sahota DS, Chan LW, Law LW, Fung TY, Leung TN, Lau TK. Prediction of birth weight by fetal crown-rump length and maternal serum levels of pregnancy-associated plasma protein-A in the first trimester. *Ultrasound Obstet Gynecol* 2008;**31**:10–14.
- Linn S, Schoenbaum SC, Monson RR, Rosner B, Stubblefield PG, Ryan KJ. The relation between induced abortion and outcome of subsequent pregnancies. *Am J Obstet Gynecol* 1983;**146**:136–141.
- Lopes A, King PA, Duthie SJ, To WK, Ma HK. The impact of multiple induced abortions on the outcome of subsequent pregnancy. *Aust NZ J Obstet Gynaecol* 1991;**31**:41–43.
- Lopes FL, Desmarais JA, Murphy BD. Embryonic diapause and its regulation. *Reproduction* 2004;**128**:669–678.
- Lumley J. Very low birth-weight (<1,500 g) and previous induced abortion: Victoria 1982–1983. *Aust NZ J Obstet Gynaecol* 1986;**26**:268–272.
- Maconochie N, Doyle P, Prior S, Simmons R. Risk factors for first trimester miscarriage – results from a UK-population-based case-control study. *Br J Obstet Gynaecol* 2007;**114**:170–186.
- Mandelson MT, Maden CB, Daling JR. Low birth weight in relation to multiple induced abortions. *Am J Public Health* 1992;**82**:391–394.
- Mantoni M, Pedersen JF. Intrauterine haematoma—an ultrasonic study of threatened abortion. *Br J Obstet Gynaecol* 1981;**88**:47–51.
- Mäkikallio K, Tekay A, Jouppila P. Effects of bleeding on uteroplacental, umbilicoplacental and yolk-sac hemodynamics in early pregnancy. *Ultrasound Obstet Gynecol* 2001;**18**:352–356.
- Martius JA, Steck T, Oehler MK, Wulf KH. Risk factors associated with preterm (<37+0 weeks) and early preterm birth (<32 weeks): univariate and multivariate analysis of 106,345 singleton births from 1994 statewide perinatal survey of Bavaria. *Eur J Obstet Gynecol Reprod Biol* 1998;**80**:183–189.
- Maso G, D'Ottavio G, De Seta F, Sartore A, Piccoli M, Mandruzzato G. First-trimester intrauterine hematoma and outcome of pregnancy. *Obstet Gynecol* 2005;**105**:339–344.
- Meirik O, Bergström R. Outcome of delivery subsequent to vacuum-aspiration abortion in nulliparous women. *Acta Obstet Gynecol Scand* 1983;**62**:499–509.
- Moreau C, Kaminski M, Ancel PY, Bouyer J, Escande B, Thiriez G, Boulot P, Fresson J, Arnaud C, Subtil D et al., EPIPAGE Group. Previous induced abortions and the risk of very preterm delivery: results of the EPIPAGE study. *Br J Obstet Gynaecol* 2005;**112**:430–437.
- Mulik V, Bethel J, Bhal K. A retrospective population-based study of primigravida women on the potential effect of threatened miscarriage on obstetric outcome. *J Obstet Gynaecol* 2004;**24**:249–253.
- Nagy S, Bush M, Stone J, Lapinski RH, Gardó S. Clinical significance of subchorionic and retroplacental hematomas detected in the first trimester of pregnancy. *Obstet Gynecol* 2003;**102**:94–100.
- Nakling J, Backe B. Adverse obstetric outcome in fetuses that are smaller than expected at second trimester routine ultrasound examination. *Acta Obstet Gynecol Scand* 2002;**81**:846–851.
- Nguyen N, Savitz DA, Thorp JM. Risk factors for preterm birth in Vietnam. *Int J Gynecol Obstet* 2004;**86**:70–78.
- Nyberg DA, Cyr DR, Mack LA, Wilson DA, Shuman WP. Sonographic spectrum of placental abruption. *Am J Radiol* 1987;**148**:161–164.
- Parazzini F, Cipriani S, Chiaffarino F, Sandretti F, Bortolus R, Chiantera V. Induced abortion and risk of small-for-gestational-age birth. *Br J Obstet Gynaecol* 2007;**114**:1414–1418.
- Paz JE, Otano L, Gadow EC, Castilla EE. Previous miscarriage and stillbirth as risk factors for unfavourable outcomes in the next pregnancy. *Br J Obstet Gynaecol* 1992;**99**:808–812.
- Pearlstone M, Baxi L. Subchorionic haematoma: a review. *Obstet Gynaecol Surv* 1993;**48**:65–68.
- Pedersen JF, Mantoni M. Prevalence and significance of subchorionic hemorrhage in threatened abortion: a sonographic study. *Am J Radiol* 1990a;**154**:535–537.
- Pedersen JF, Mantoni M. Large intrauterine haematoma in threatened miscarriage. Frequency and clinical consequences. *Br J Obstet Gynaecol* 1990b;**97**:552–553.
- Pickering RM, Deeks JJ. Risks of delivery during the 20th to the 36th week of gestation. *Int J Epidemiol* 1991;**20**:456–466.
- Pickering RM, Forbes JF. Risks of preterm delivery and small-for-gestational age infants following abortion: a population study. *Br J Obstet Gynaecol* 1985;**92**:1106–1112.
- Pinborg A, Lidegaard O, Freiesleben NC, Andersen AN. Consequences of vanishing twins in IVF/ICSI pregnancies. *Hum Reprod* 2005;**20**:2821–2829.
- Pinborg A, Lidegaard O, Freiesleben NC, Andersen AN. Vanishing twins: a predictor of small-for-gestational age in IVF singletons. *Hum Reprod* 2007;**22**:2707–2714.
- Raatikainen K, Heiskanen N, Heinonen S. Induced abortion: not an independent risk factor for pregnancy outcome, but a challenge for health counselling. *Ann Epidemiol* 2006;**16**:587–592.
- Regan L, Braude PR, Trembath PL. Influence of past reproductive performance on risk of spontaneous abortion. *Br Med J* 1989;**299**:541–545.
- Reime B, Schücking BA, Wenzlaff P. Reproductive outcomes in adolescents who had a previous birth or an induced abortion compared to adolescents' first pregnancies. *BMC Pregnancy Childbirth* 2008;**31**:4.
- Reljić M. The significance of crown-rump length measurement for predicting adverse pregnancy outcome of threatened abortion. *Ultrasound Obstet Gynecol* 2001;**17**:510–512.
- Robinson HP, Fleming JEE. A critical evaluation of sonar 'crown-rump length' measurements. *Br J Obstet Gynaecol* 1975;**82**:702–710.
- Robinson JN, Regan JA, Norwitz ER. The epidemiology of preterm labor. *Semin Perinatol* 2001;**25**:204–214.
- Salomon LJ, Cavicchioni, Bernard JP, Duyme M, Ville Y. Growth discrepancy in twins in the first trimester of pregnancy. *Ultrasound Obstet Gynecol* 2005;**26**:512–516.
- Sauerbrei EE, Pham DH. Placental abruption and subchorionic hemorrhage in the first half of pregnancy: US appearance and clinical outcome. *Radiology* 1986;**160**:109–112.
- Schauberger CW, Mathiason MA, Rooney BL. Ultrasound assessment of first-trimester bleeding. *Obstet Gynecol* 2005;**105**:333–338.
- Schemmer G, Wapner RJ, Johnson A, Schemmer M, Norton HJ, Anderson WE. First-trimester growth patterns of aneuploid fetuses. *Prenat Diagn* 1997;**17**:155–159.
- Schiesser M, Lapaire O, Tercanli S, Holzgreve W. Lost intrauterine devices during pregnancy: maternal and fetal outcome after ultrasound-guided extraction. An analysis of 82 cases. *Ultrasound Obstet Gynecol* 2004;**23**:486–489.
- Schiff MA, Reed SD, Daling JR. The sex ratio of pregnancies complicated by hospitalization for hyperemesis gravidarum. *Br J Obstet Gynaecol* 2004;**111**:27–30.
- Schoenbaum SC, Monson RR, Stubblefield PG, Darney PD, Ryan KJ. Outcome of the delivery following an induced or spontaneous abortion. *Am J Obstet Gynecol* 1980;**136**:19–24.

- Sebire NJ, D'Ercole C, Soares W, Nayar R, Nicolaidis K. Intertwin disparity in fetal size in monochorionic and dichorionic pregnancies. *Obstet Gynecol* 1998;**91**:82–85.
- Sedgh G, Henshaw S, Singh S, Åhman E, Shah IH. Induced abortion: estimated rates and trends worldwide. *Lancet* 2007;**370**:1338–1345.
- Seidman DS, Ever-Hadani P, Slater PE, Harlap S, Stevenson DK, Gale R. Child-bearing after induced abortion: reassessment of risk. *J Epidemiol Community Health* 1988;**42**:294–298.
- Seidman DS, Ever-Hadani P, Stevenson DK, Gale R. The effect of abortion on the incidence of preeclampsia. *Eur J Obstet Gynecol Reprod Biol* 1989;**33**:109–114.
- Shebl O, Ebner T, Sommergruber M, Sir A, Tews G. Birth weight is lower for survivors of the vanishing twin syndrome: a case-control study. *Fertil Steril* 2008;**90**:310–314.
- Sheiner E, Levy A, Katz M, Mazor M. Pregnancy outcome following recurrent spontaneous abortions. *Eur J Obstet Gynecol Reprod Biol* 2005;**118**:61–65.
- Sipilä P, Hartikainen-Sorri AL, Oja H, Von Wendt L. Perinatal outcome of pregnancies complicated by vaginal bleeding. *Br J Obstet Gynaecol* 1992;**99**:959–963.
- Smith GC. First trimester origins of fetal growth impairment. *Semin Perinatol* 2004;**28**:41–50.
- Smith GC, Smith MF, McNay MB, Fleming JE. First-trimester growth and the risk of low birth weight. *N Engl J Med* 1998;**339**:1817–1822.
- Smith GC, Shah I, White IR, Pell JP, Crossley JA, Dobbie R. Maternal and biochemical predictors of spontaneous preterm births among nulliparous women: a systematic analysis in relation to the degree of prematurity. *Int J Epidemiol* 2006;**35**:1169–1177.
- Stone JL, Lockwood CJ, Berkowitz GS, Alvarez M, Lapinski R, Berkowitz RL. Risk factors for severe preeclampsia. *Obstet Gynecol* 1994;**83**:357–361.
- Strobino B, Pantel-Silverman J. Gestational vaginal bleeding and pregnancy outcome. *Am J Epidemiol* 1989;**129**:806–815.
- Tai J, Grobman WA. The association of crown-rump length discordance in twin gestations with adverse perinatal outcomes. *Am J Obstet Gynecol* 2007;**197**:369.e1–369.e4.
- Tam WH, Tsui MH, Lok IH, Yip SK, Yuen PM, Chung TK. Long-term reproductive outcome subsequent to medical versus surgical treatment for miscarriage. *Hum Reprod* 2005;**20**:3355–3359.
- Tatum HJ, Schmidt FH, Jain AK. Management and outcome of pregnancies associated with the Copper T intrauterine contraceptive device. *Am J Obstet Gynecol* 1976;**126**:869–879.
- Thom DH, Nelson LM, Vaughan TL. Spontaneous Miscarriage and subsequent adverse birth outcomes. *Am J Obstet Gynecol* 1992;**166**:111–116.
- Thonneau P, Goulard H, Goyaux N. Risk factors for intrauterine device failure: a review. *Contraception* 2001;**64**:33–37.
- Tsang IS, Katz VL, Wells SD. Maternal and fetal outcomes in hyperemesis gravidarum. *Int J Gynaecol Obstet* 1996;**55**:231–235.
- Tsakamoto H, Fukuoka H, Inoue K, Koyasu M, Nagai Y, Takimoto H. Restricting weight gain during pregnancy in Japan: a controversial factor in reducing perinatal complications. *Eur J Obstet Gynecol Reprod Biol* 2007;**133**:53–59.
- Verberg MF, Gillott DJ, Al-Fardan N, Grudzinskas JG. Hyperemesis gravidarum, a literature review. *Hum Reprod Update* 2005;**11**:527–539.
- Vilming B, Nesheim BI. Hyperemesis gravidarum in a contemporary population in Oslo. *Acta Obstet Gynecol Scand* 2000;**79**:640–643.
- Virk J, Zhang J, Olsen J. Medical abortion and the risk of subsequent adverse pregnancy outcomes. *N Engl J Med* 2007;**16**:648–653.
- Weiss JL, Malone FD, Vidaver J, Ball RH, Nyberg DA, Comstock CH, Hankins GD, Berkowitz RL, Gross SJ, Dugoff L et al.; FASTER Consortium. Threatened abortion: a risk factor for poor pregnancy outcome, a population-based screening study. *Am J Obstet Gynecol* 2004;**190**:745–750.
- Weissman A, Achiron R, Lipitz S, Blickstein I, Mashiach S. The first trimester growth-discordant twin: an ominous prenatal finding. *Obstet Gynecol* 1994;**84**:110–114.
- Wijesiriwardana A, Bhattacharya S, Shetty A, Smith N, Bhattacharya S. Obstetric outcome in women with threatened miscarriage in the first trimester. *Obstet Gynecol* 2006;**107**:557–562.
- Williams MA, Mittendorf R, Lieberman E, Monson RR. Adverse infant outcomes associated with first-trimester vaginal bleeding. *Obstet Gynecol* 1991;**78**:14–18.
- Yang J, Hartmann KE, Savitz DA, Herring AH, Dole N, Olshan AF, Thorp JM. Vaginal bleeding during pregnancy and preterm birth. *Am J Epidemiol* 2004;**160**:118–125.
- Zhou W, Olsen J. Are complications after an induced abortion associated with reproductive failures in a subsequent pregnancy? *Acta Obstet Gynecol Scand* 2003;**82**:177–181.
- Zhou W, Sørensen HT, Olsen J. Induced abortion and subsequent pregnancy duration. *Obstet Gynecol* 1999;**94**:948–953.
- Zhou W, Sørensen HT, Olsen J. Induced abortion and low birthweight in the following pregnancy. *Int J Epidemiol* 2000;**29**:100–106.
- Zhou W, Nielsen GL, Larsen H, Olsen J. Induced abortion and placenta complications in the subsequent pregnancy. *Acta Obstet Gynecol Scand* 2001;**80**:1115–1120.
- Zhou W, Nielsen GL, Moller M, Olsen J. Short-term complications after surgically induced abortions: a register-based study of 56117 abortions. *Acta Obstet Gynecol Scand*. 2002;**81**:331–336.

Submitted on October 7, 2008; resubmitted on January 5, 2009; accepted on February 7, 2009
